# Supplementary material for: Antioxidant Defense Enzyme Genes and Asthma Susceptibility: Gender-Specific Effects and Heterogeneity in Gene-Gene Interactions between Pathogenetic Variants of the Disease
Source: Hindawi journal article supplement (doi:10.1155/2014/708903), 2014-01-01
Supplement: f1 [file 708903.f1.pdf]

## Comparative expression profiles of genes for antioxidant defense enzymes in various cell types/tissues/organs in human

(Data retrieved from BioGPS web site, <http://biogps.org>)\*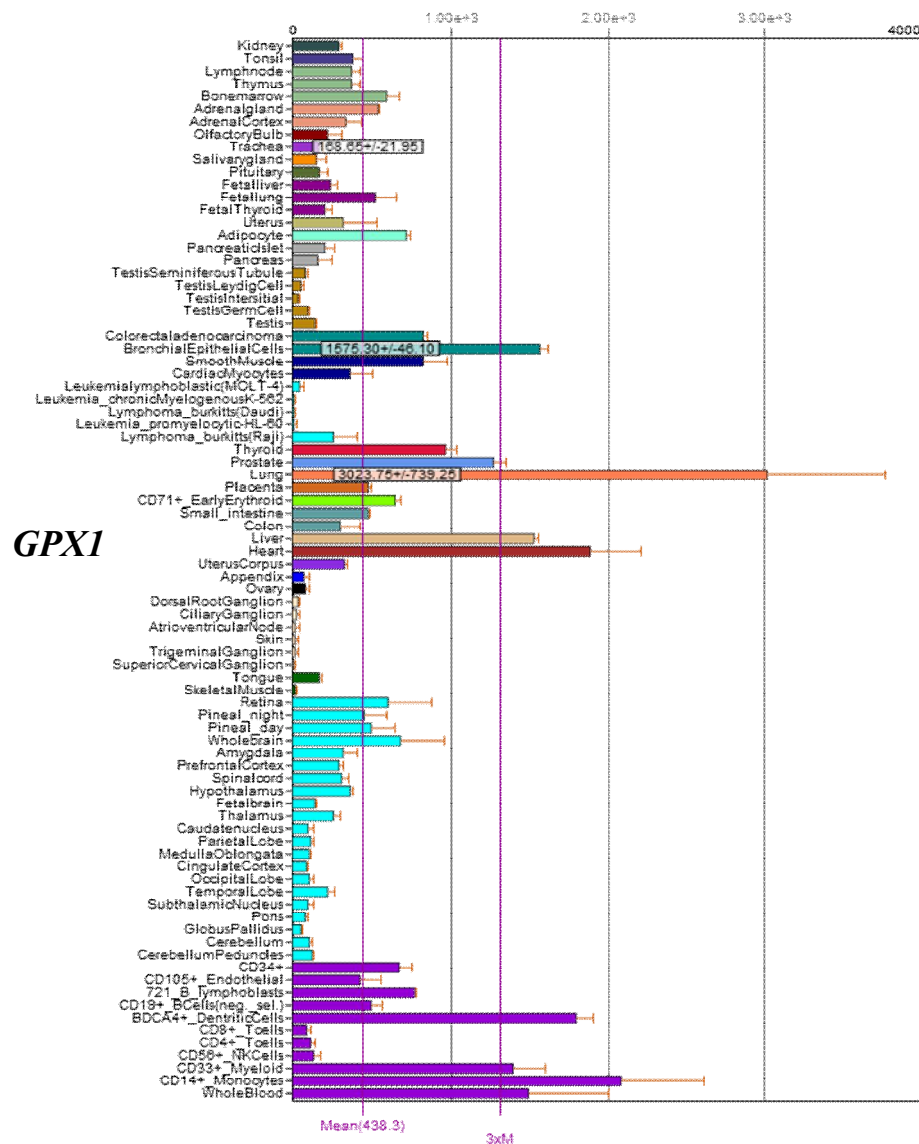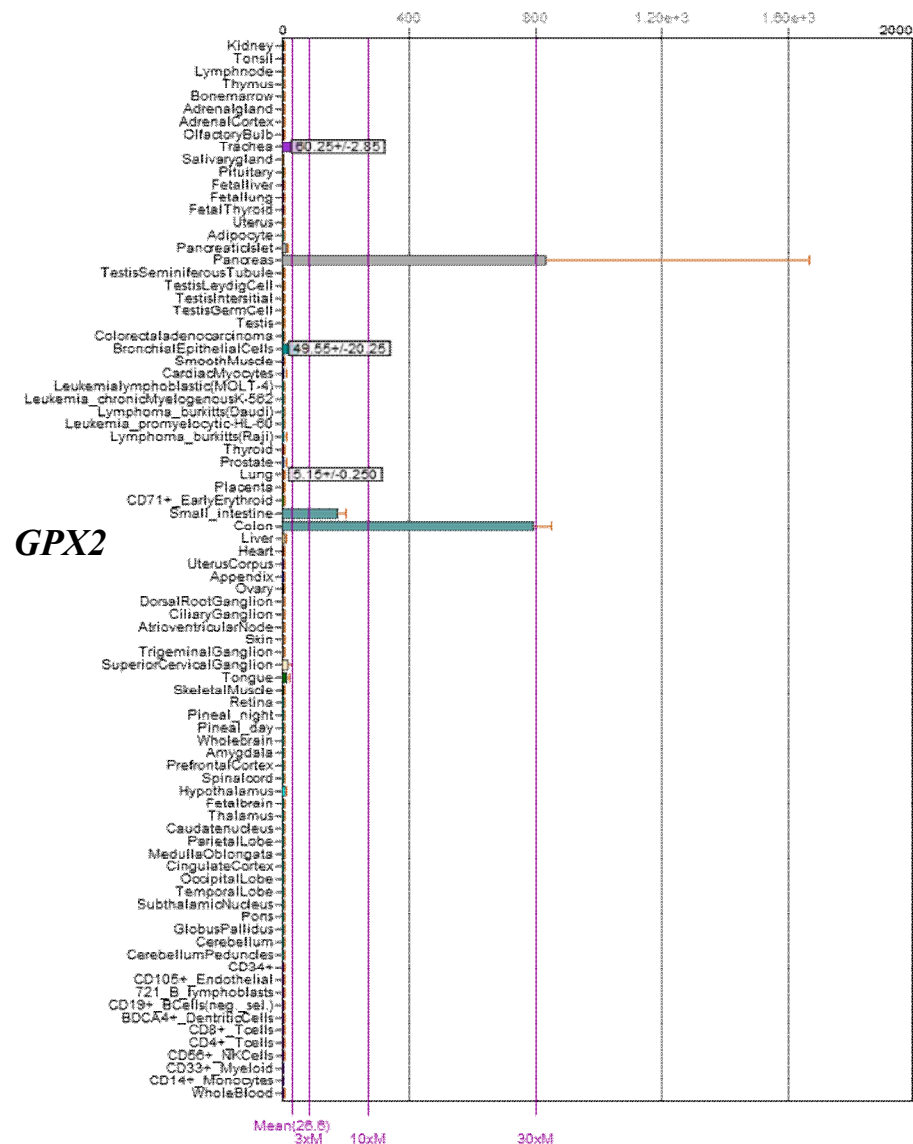

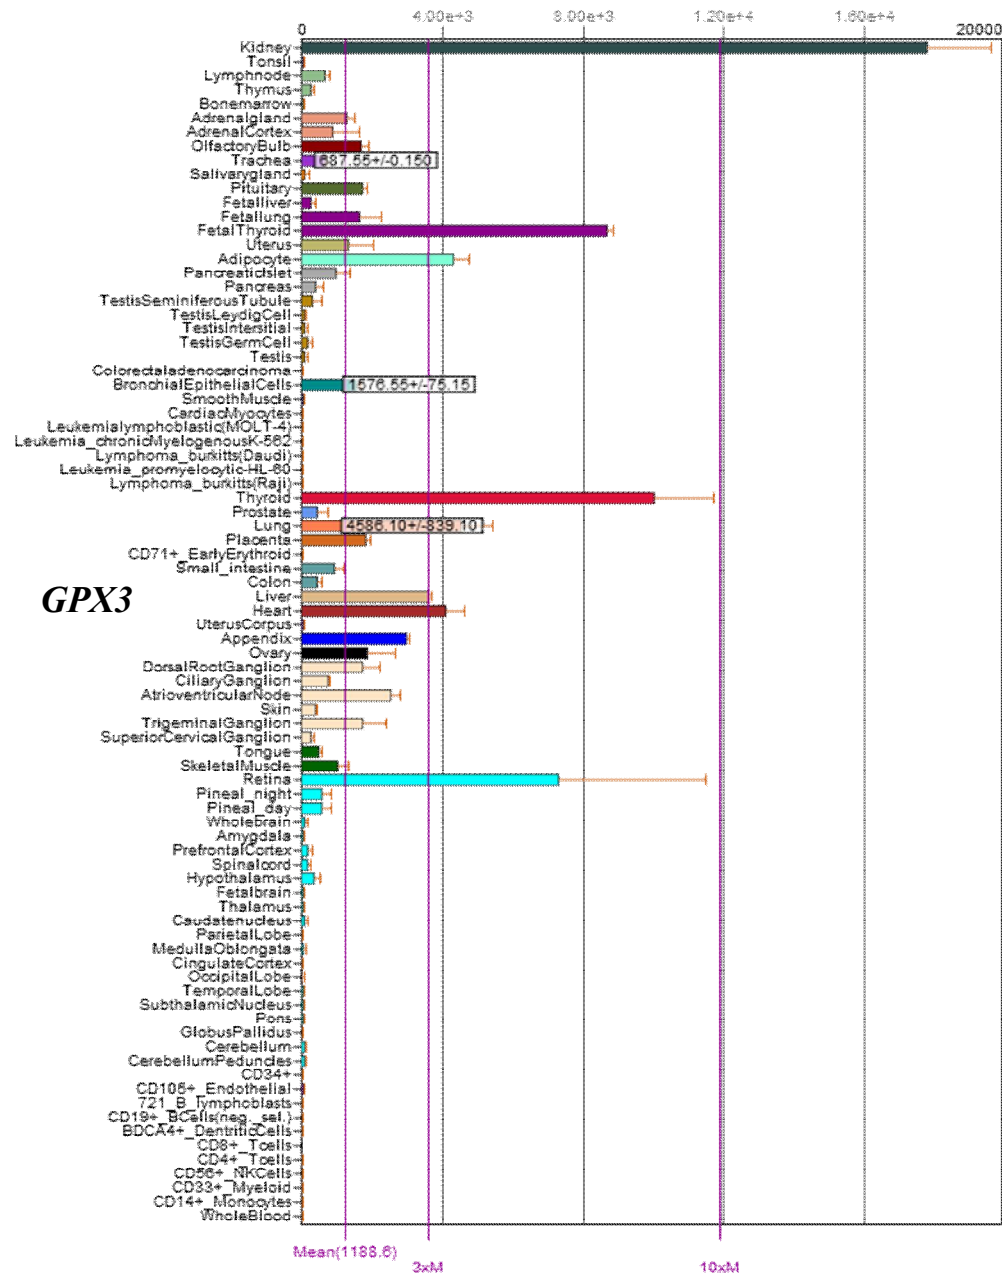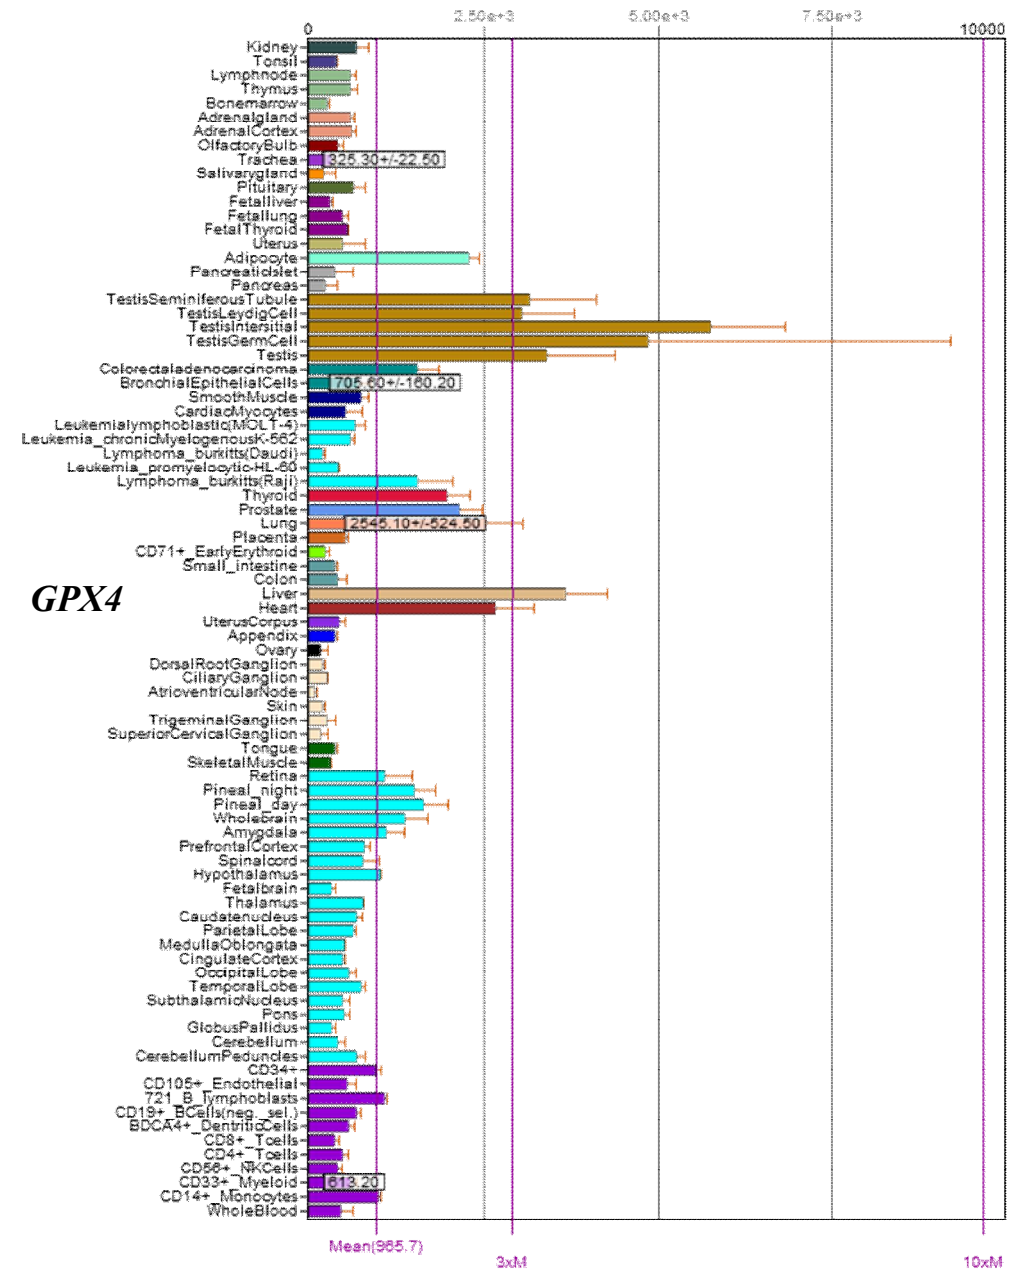

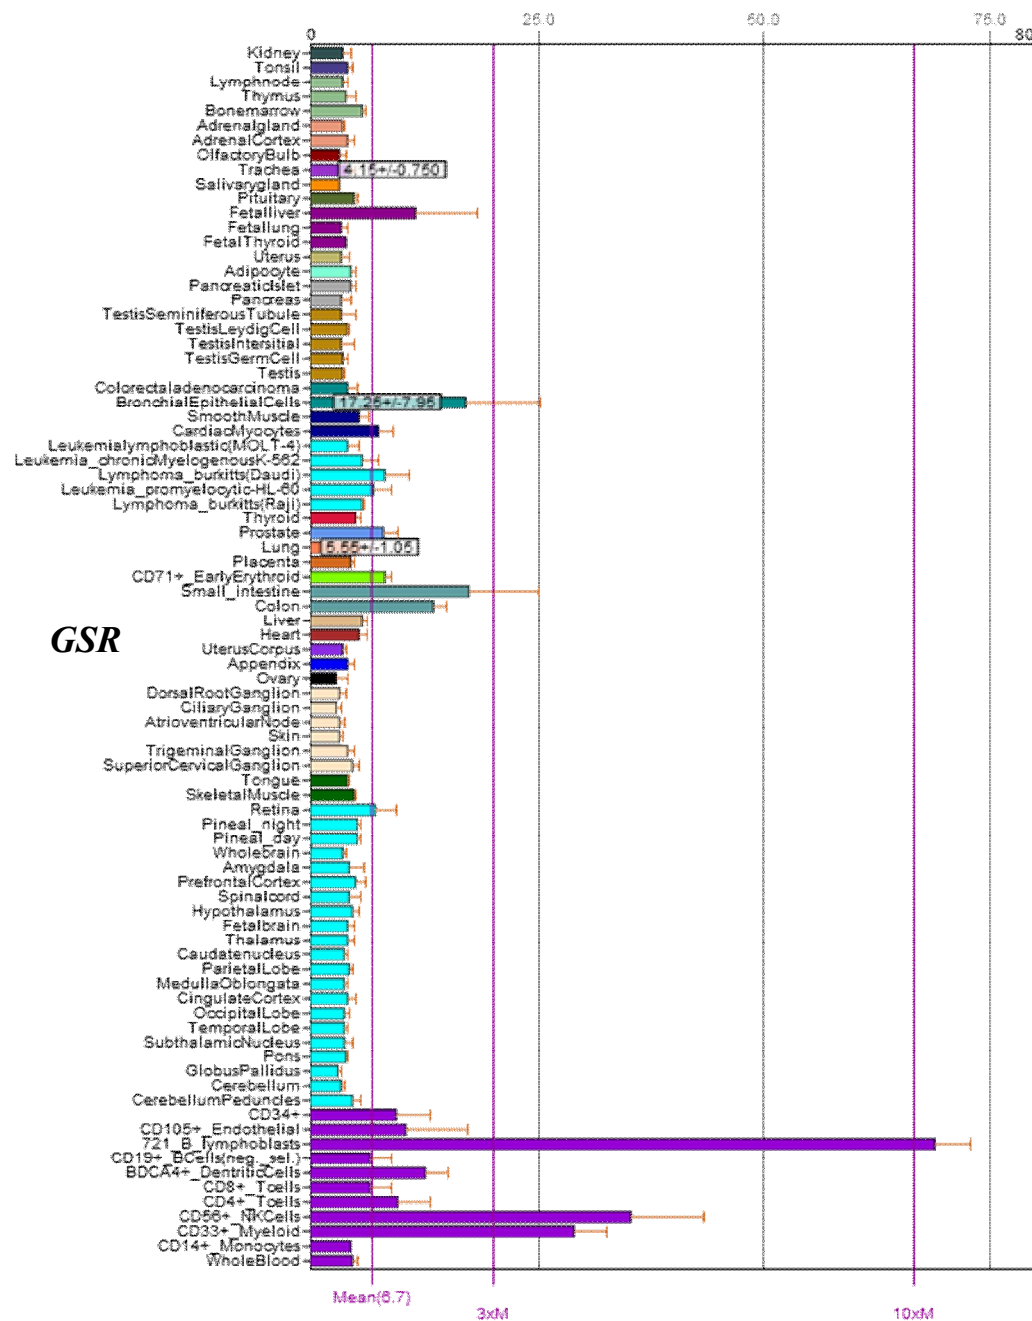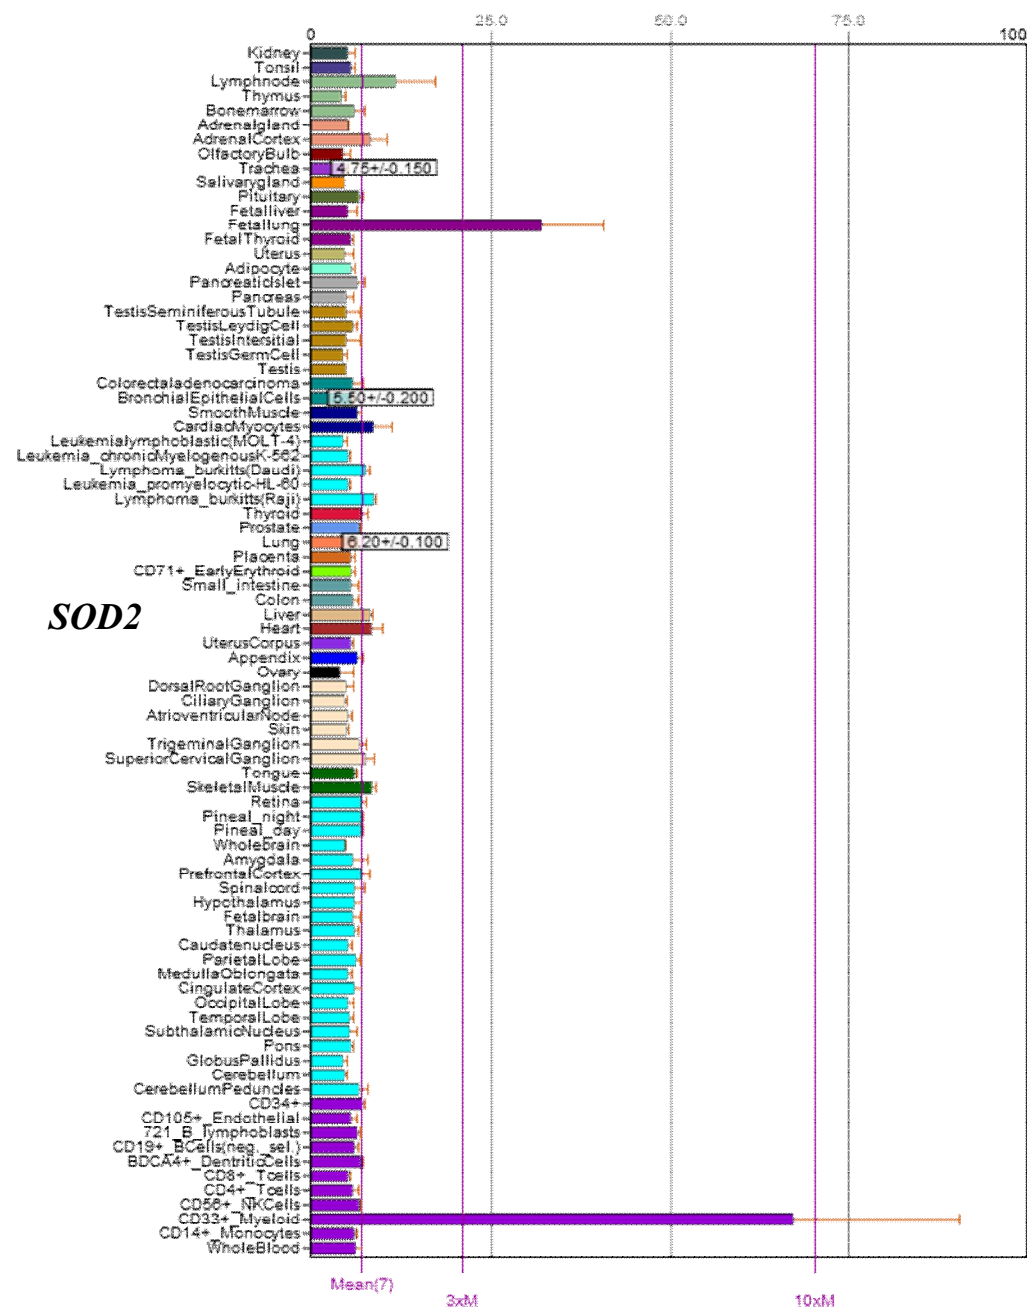

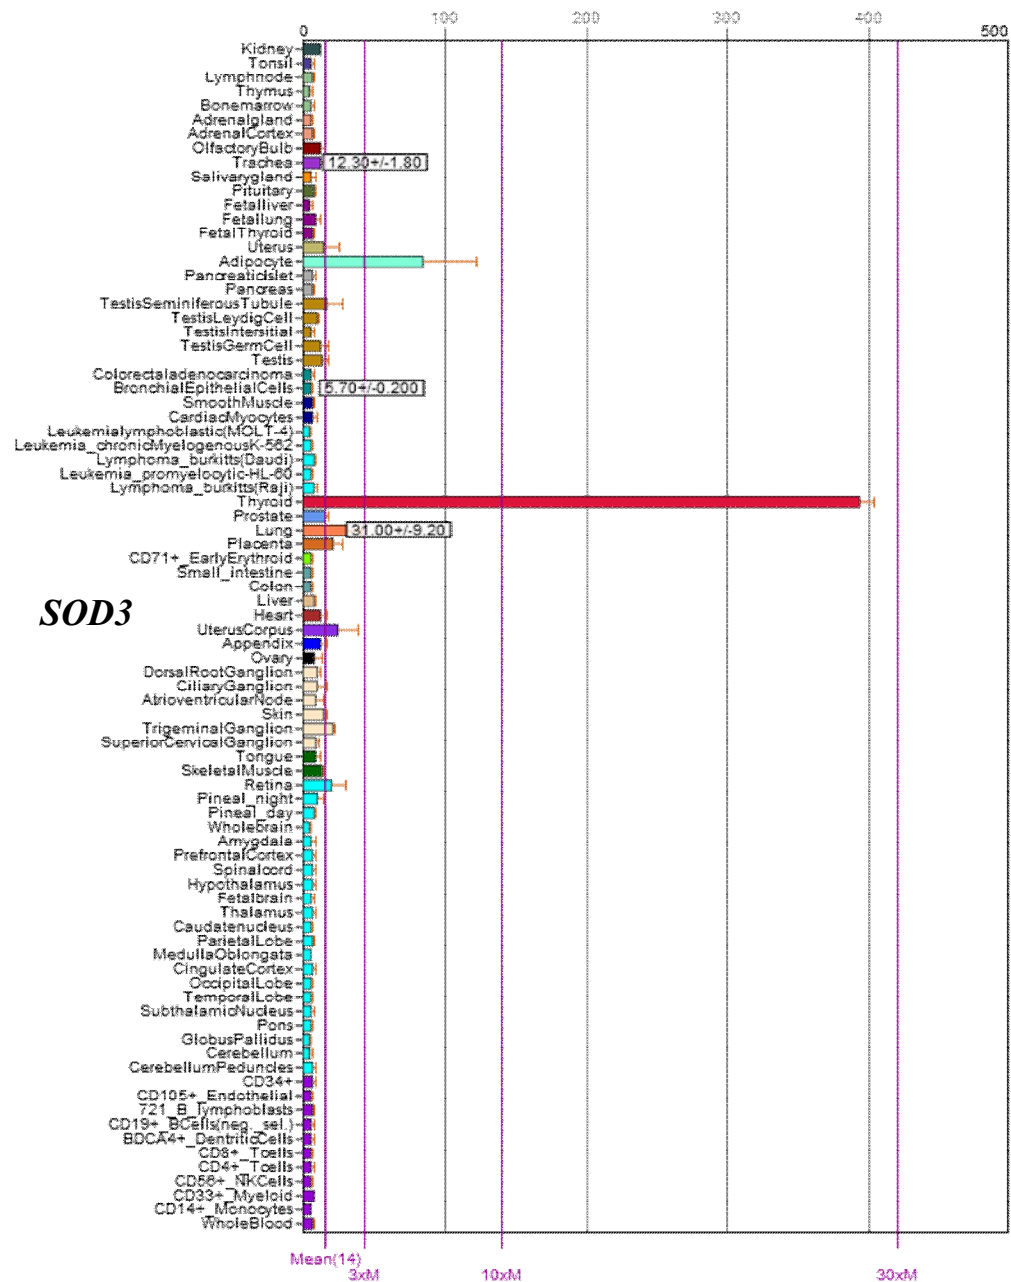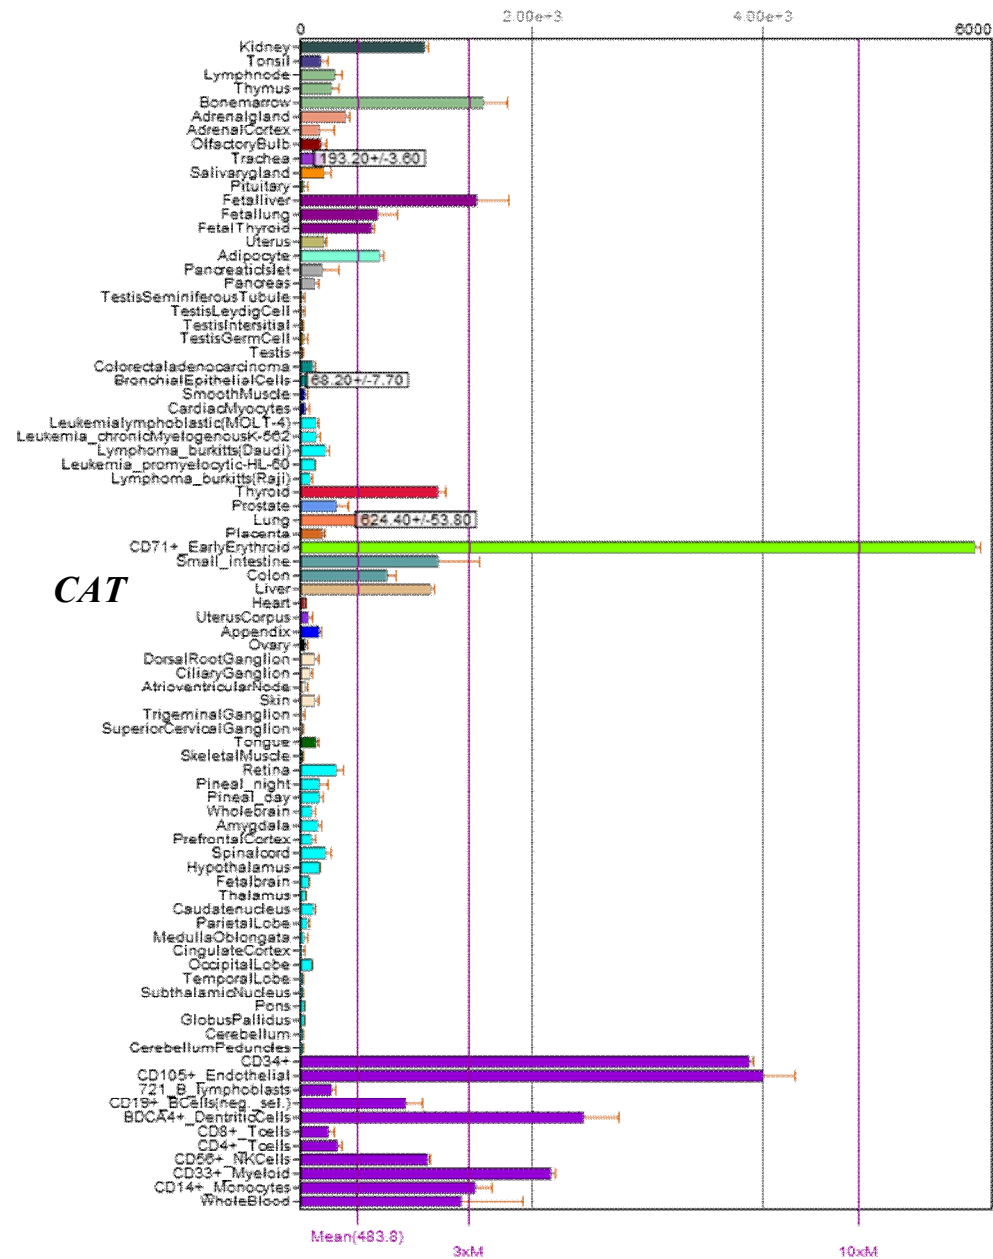



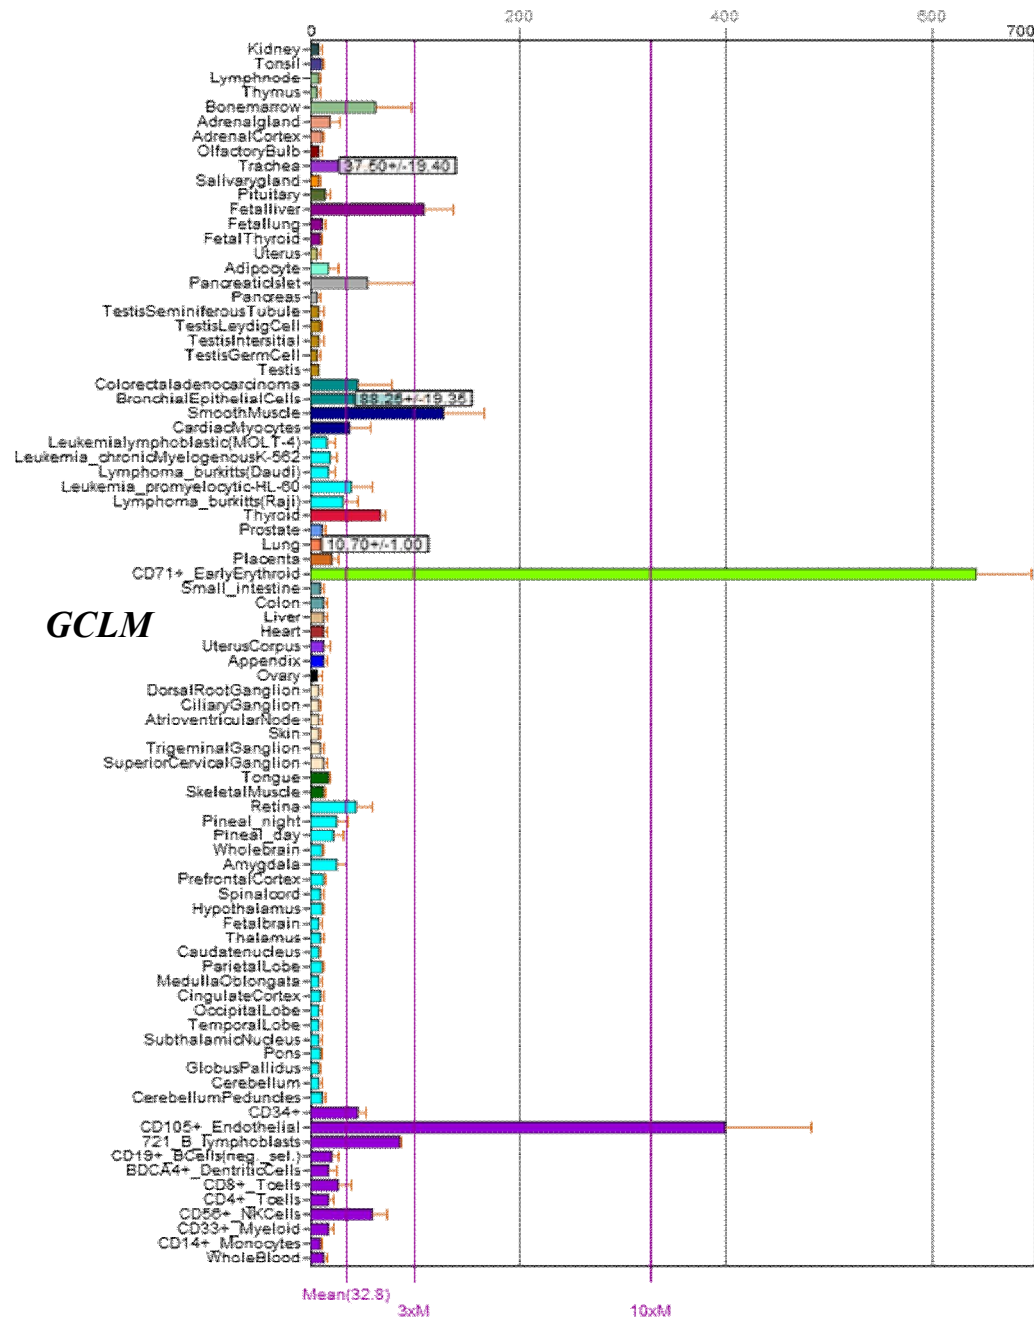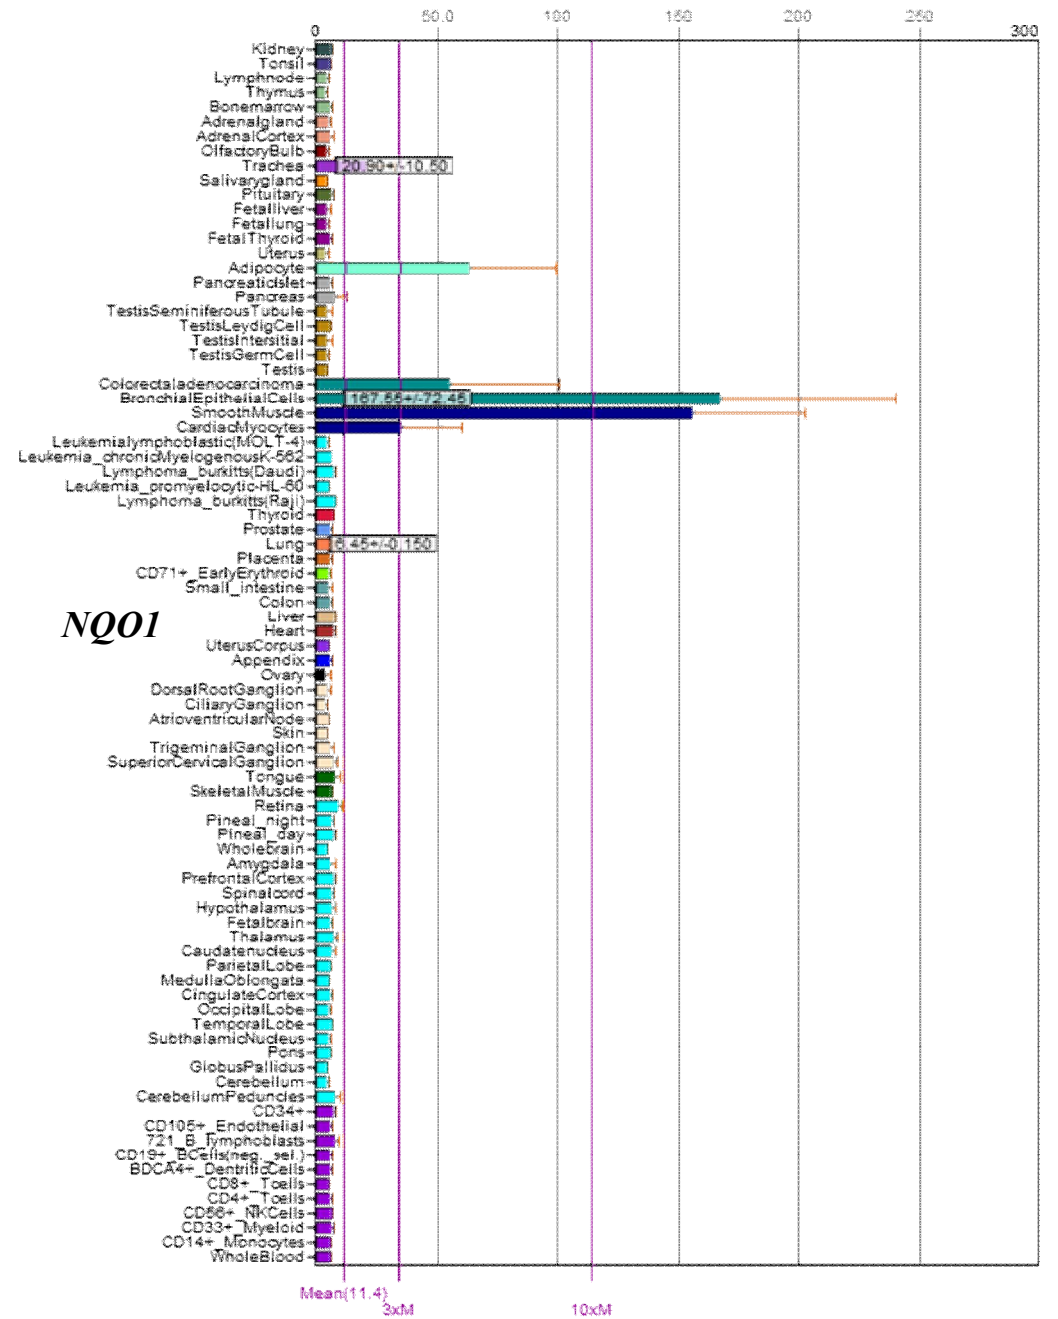

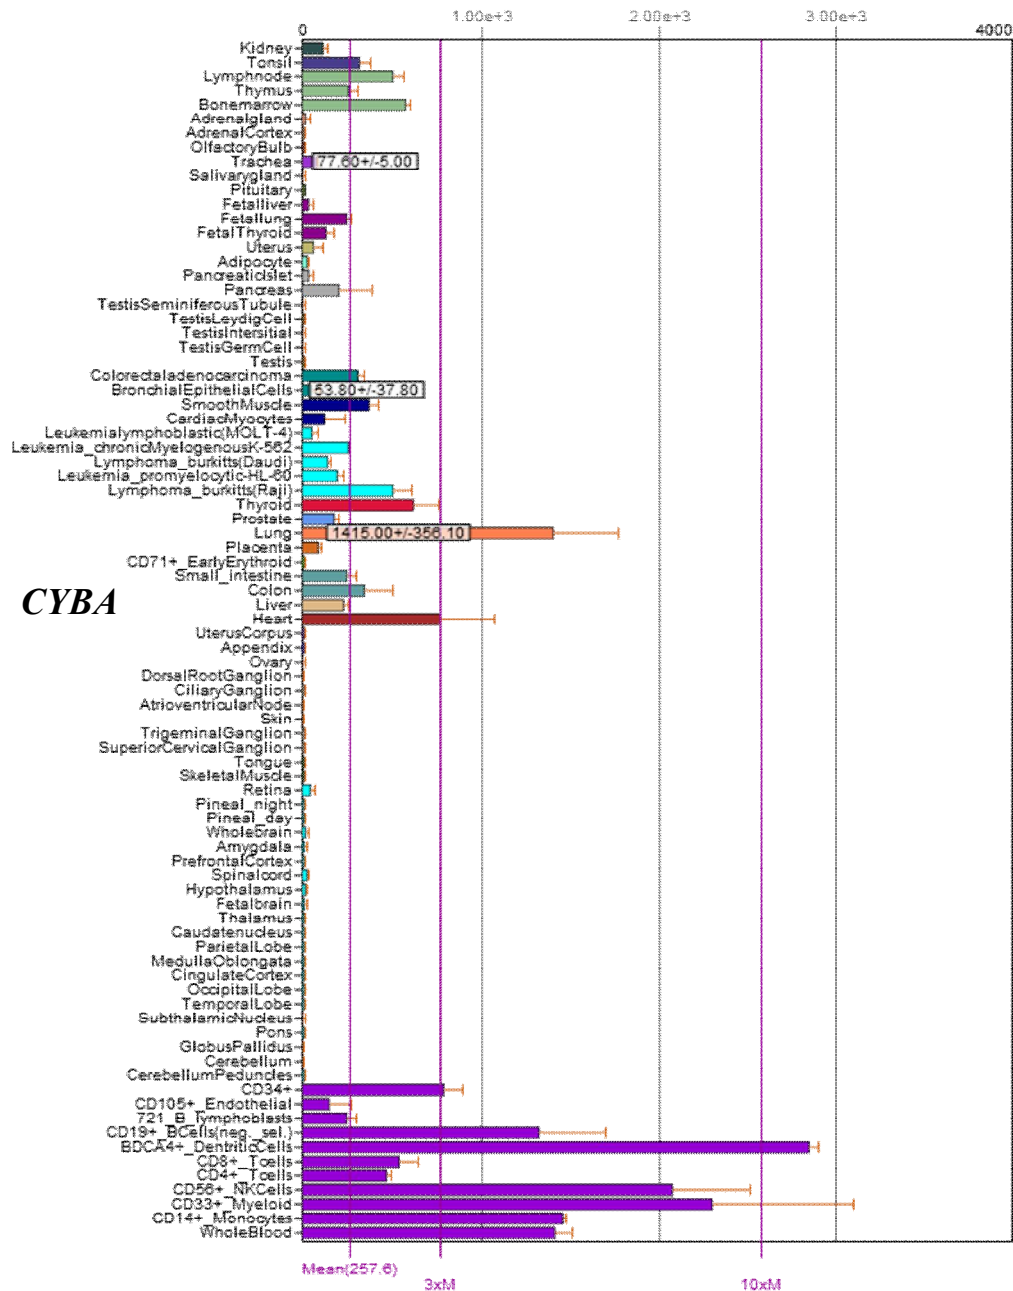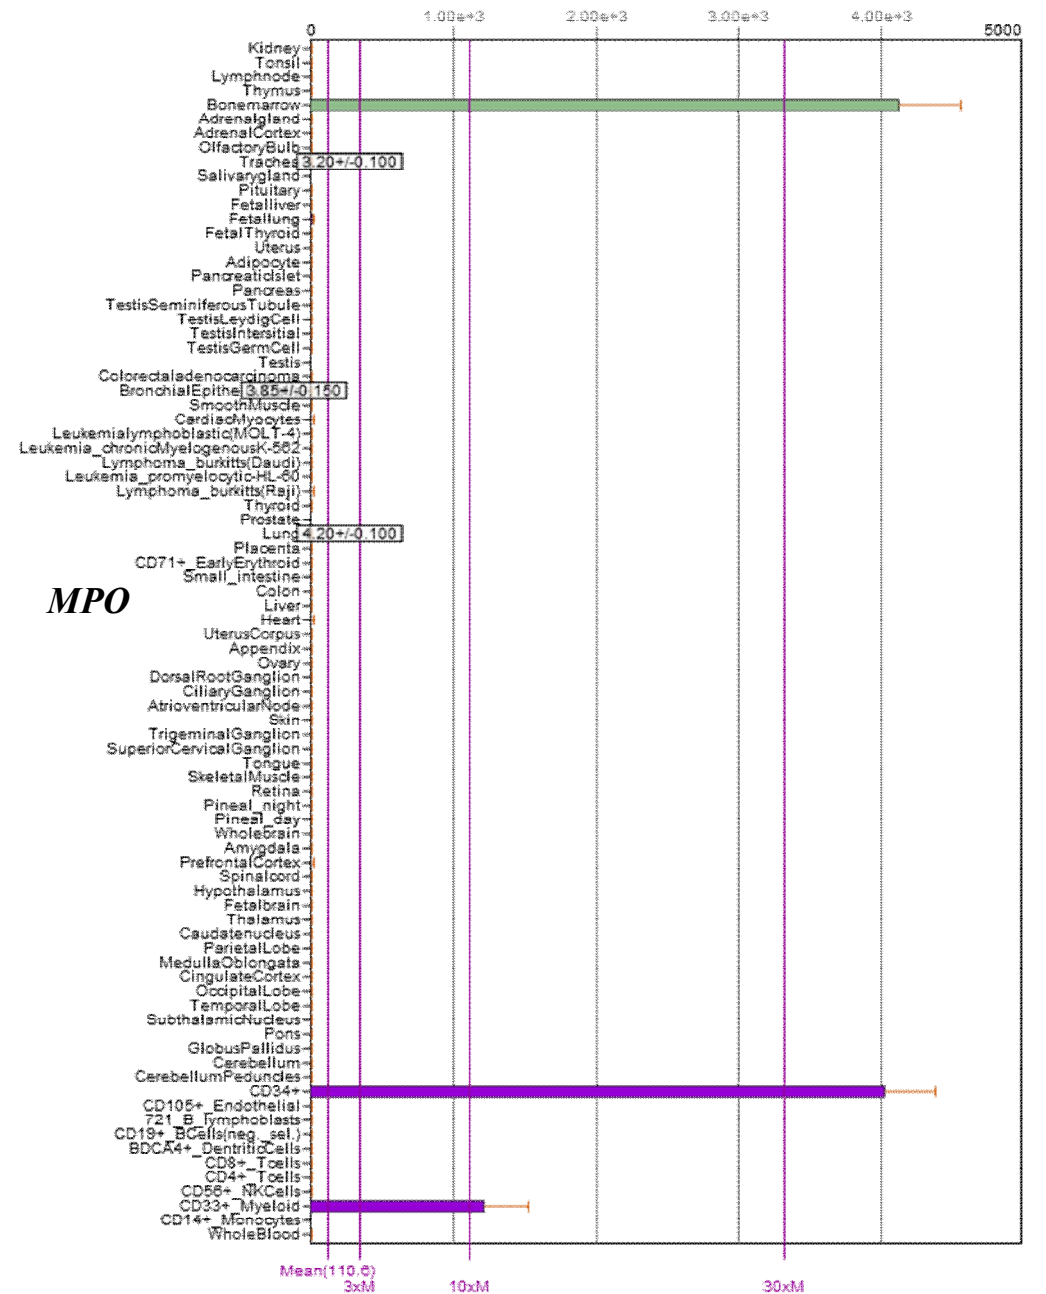

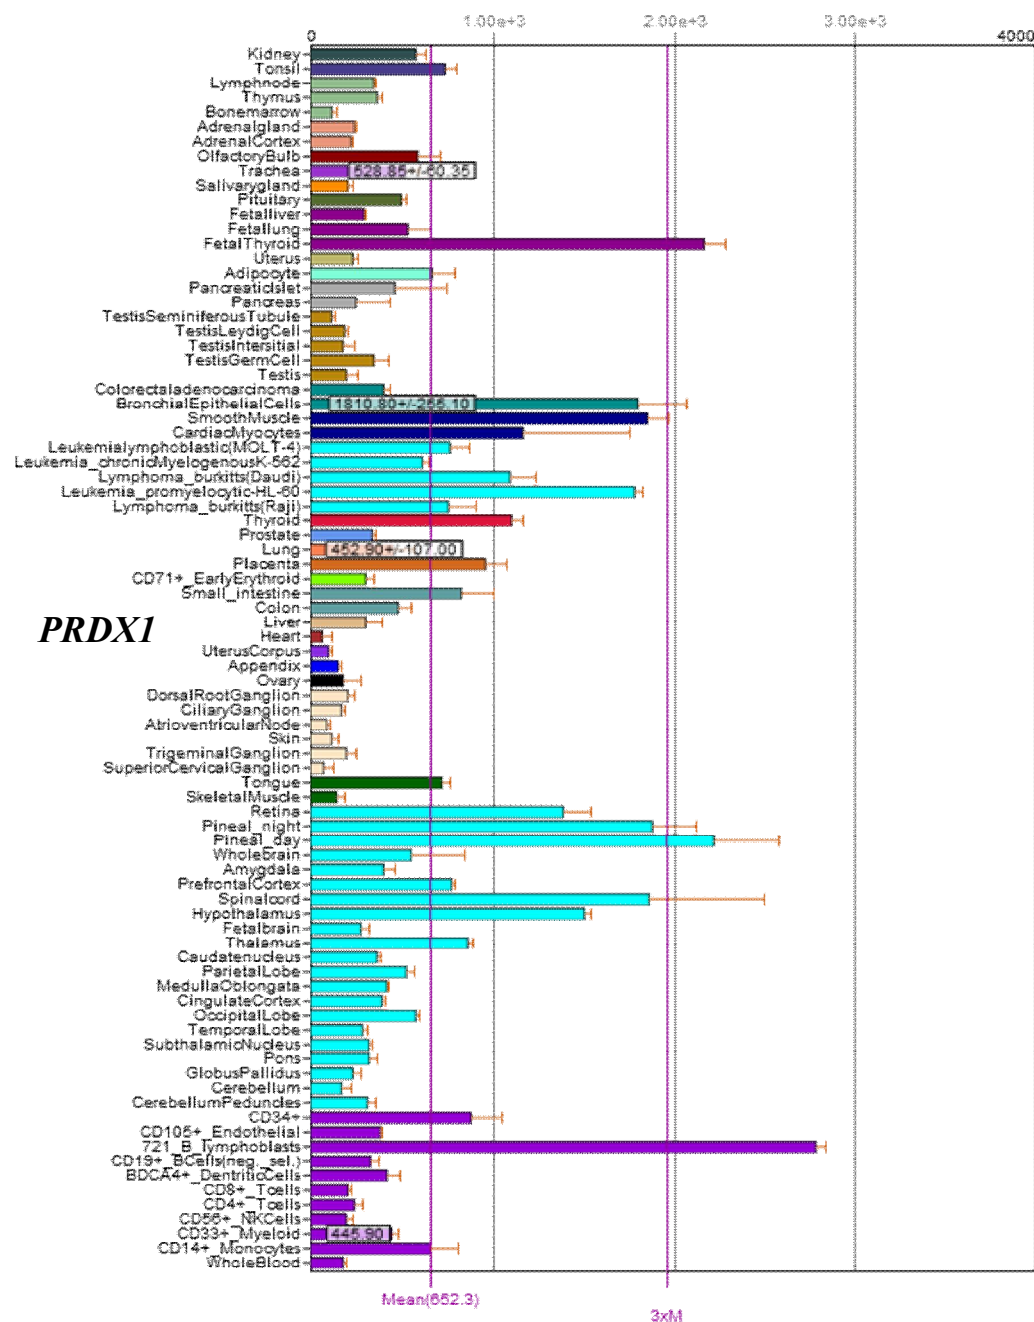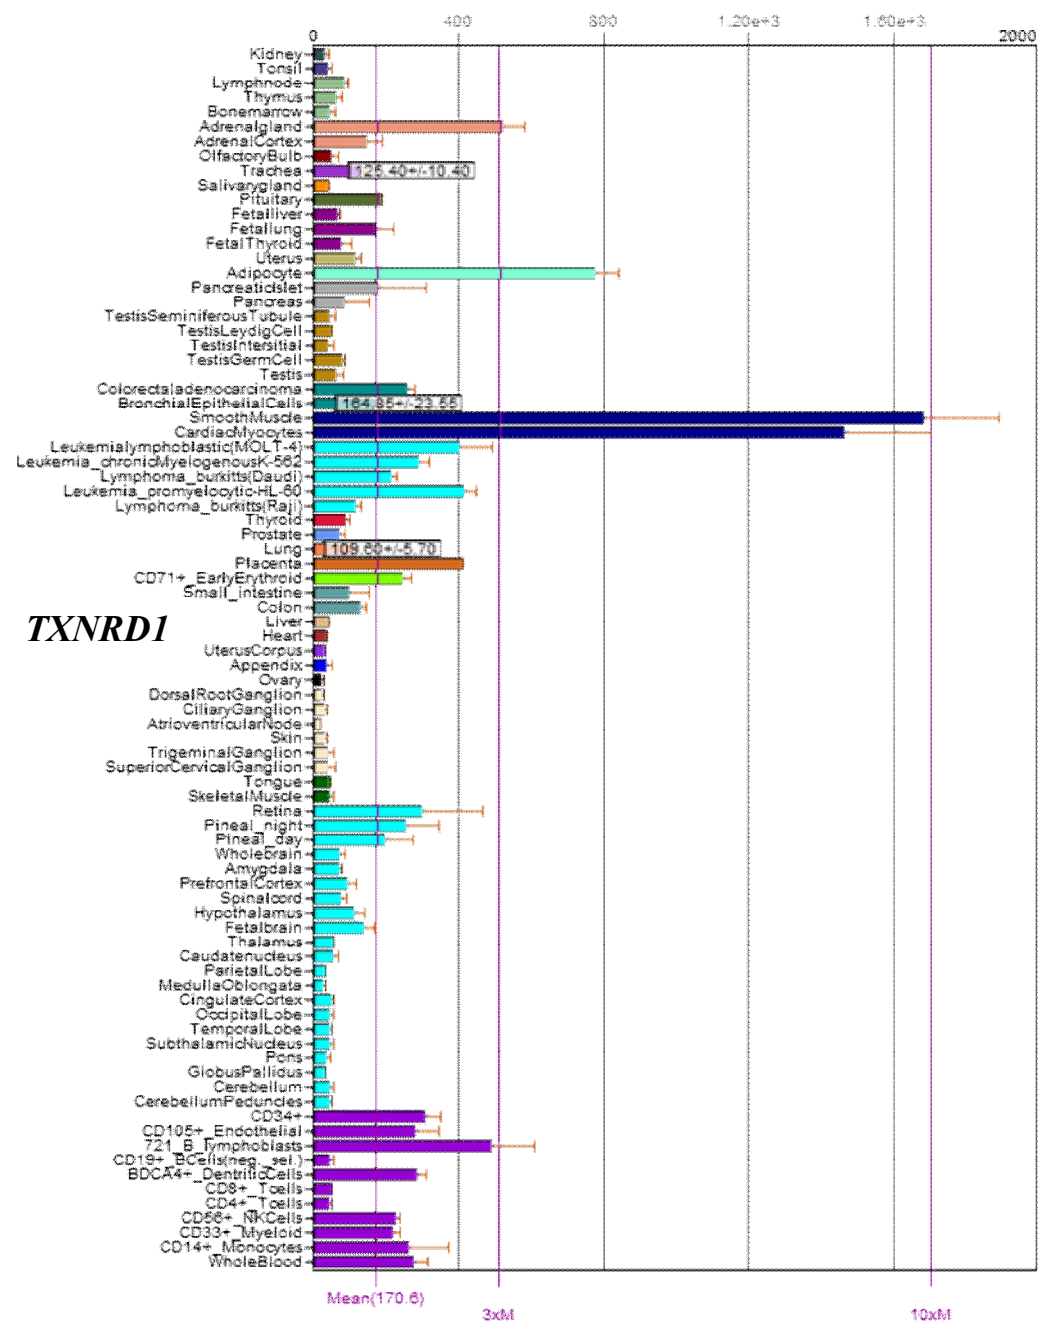



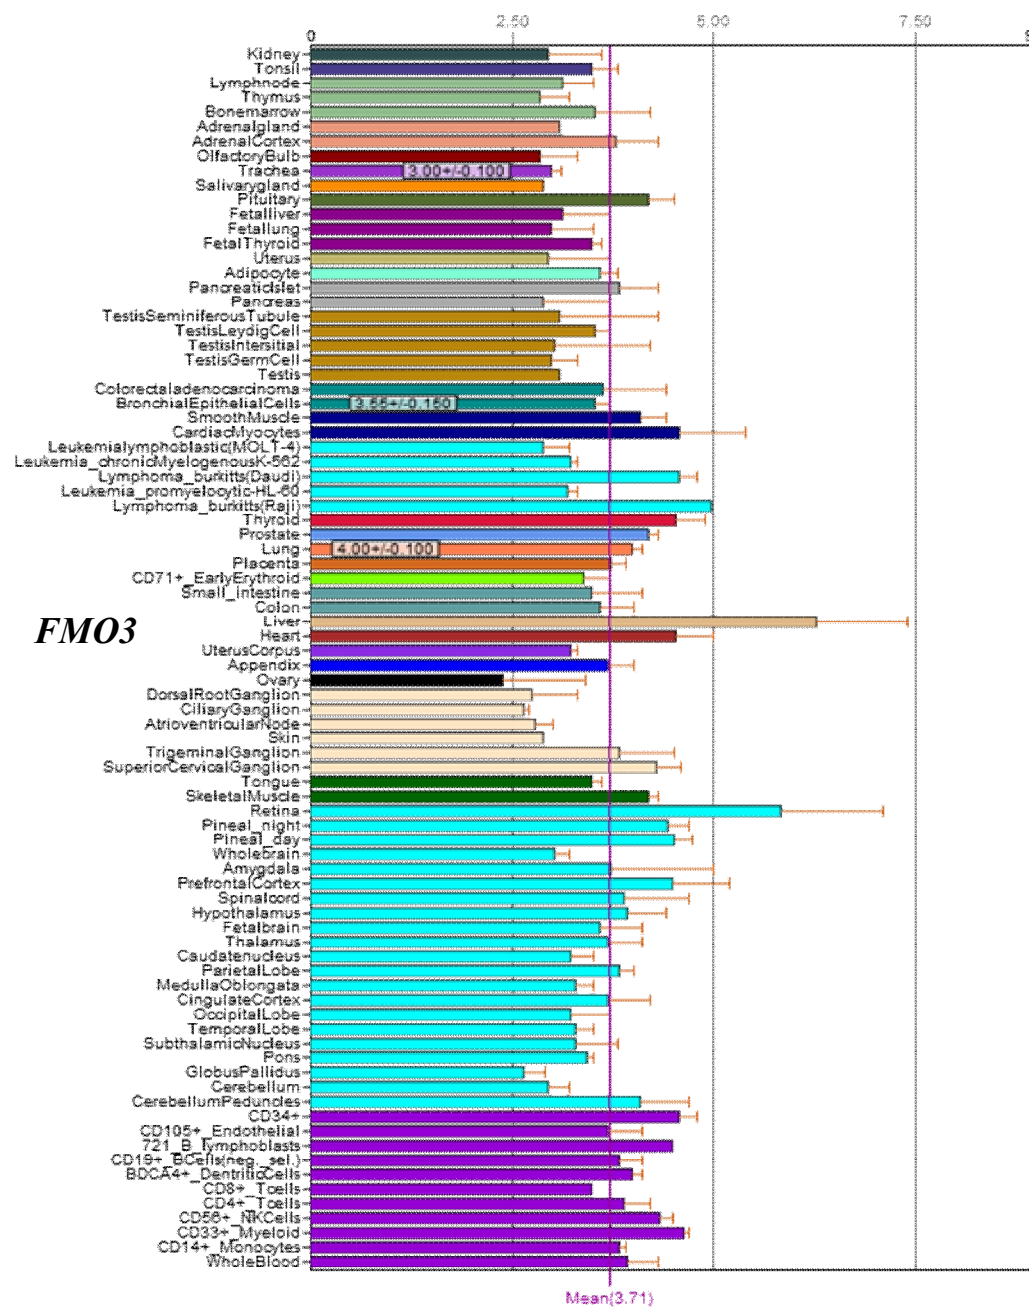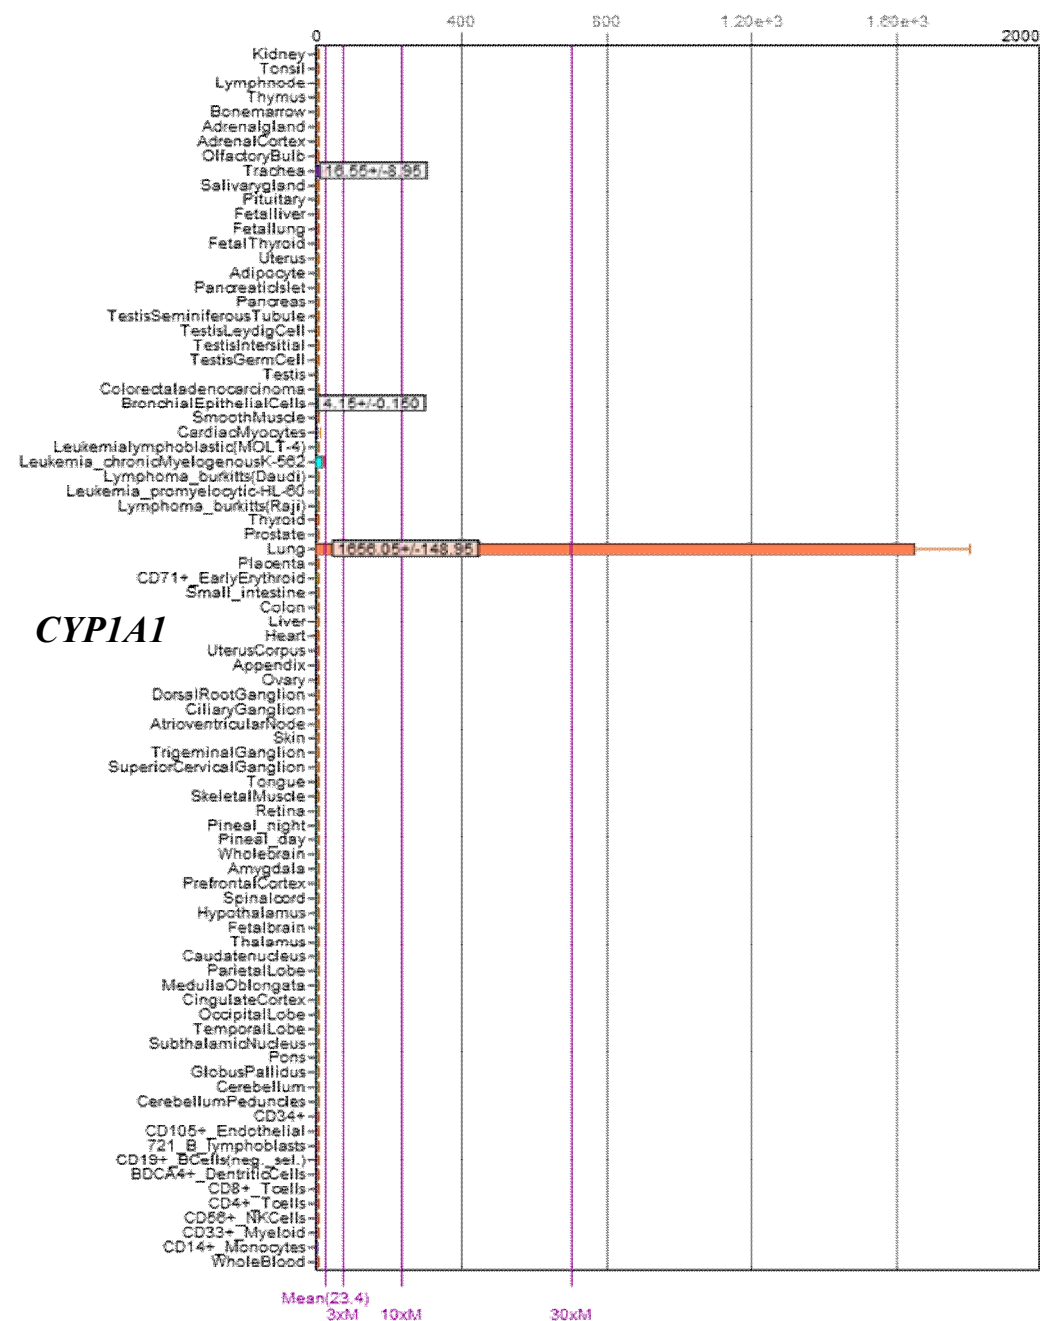



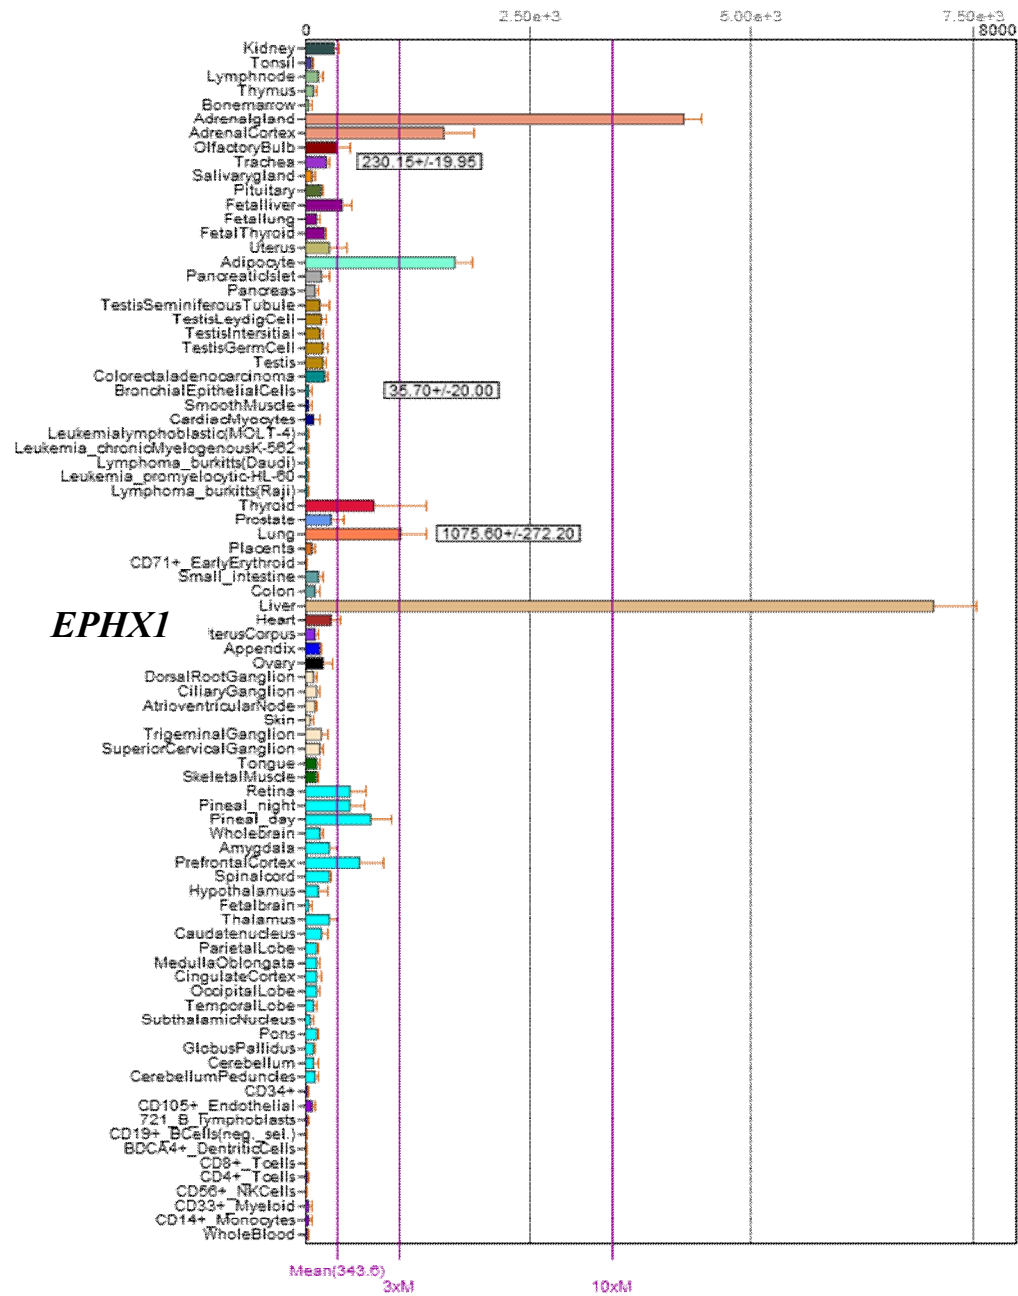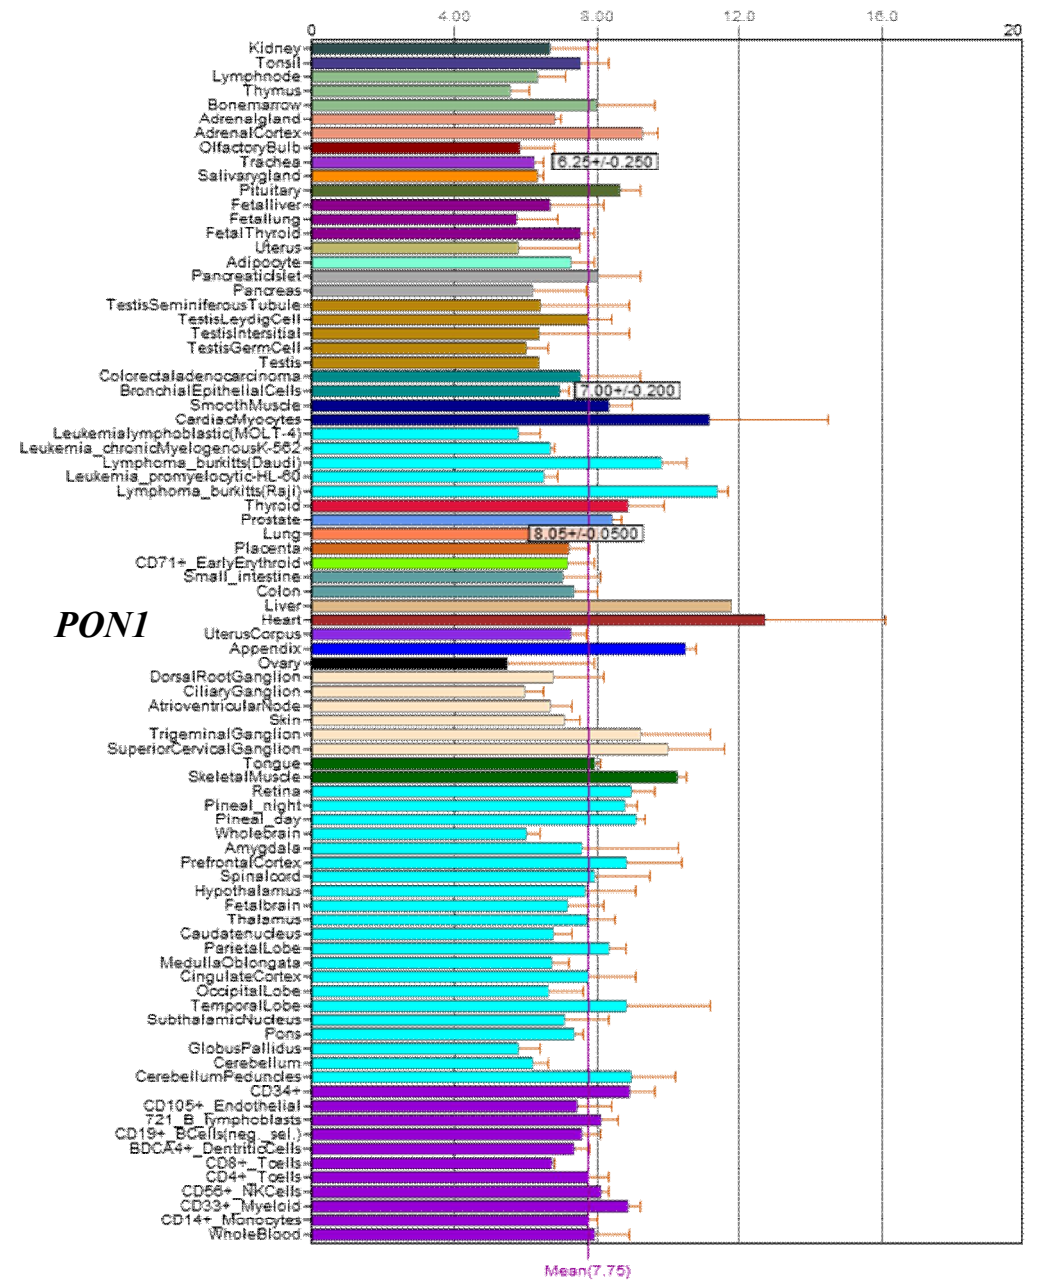

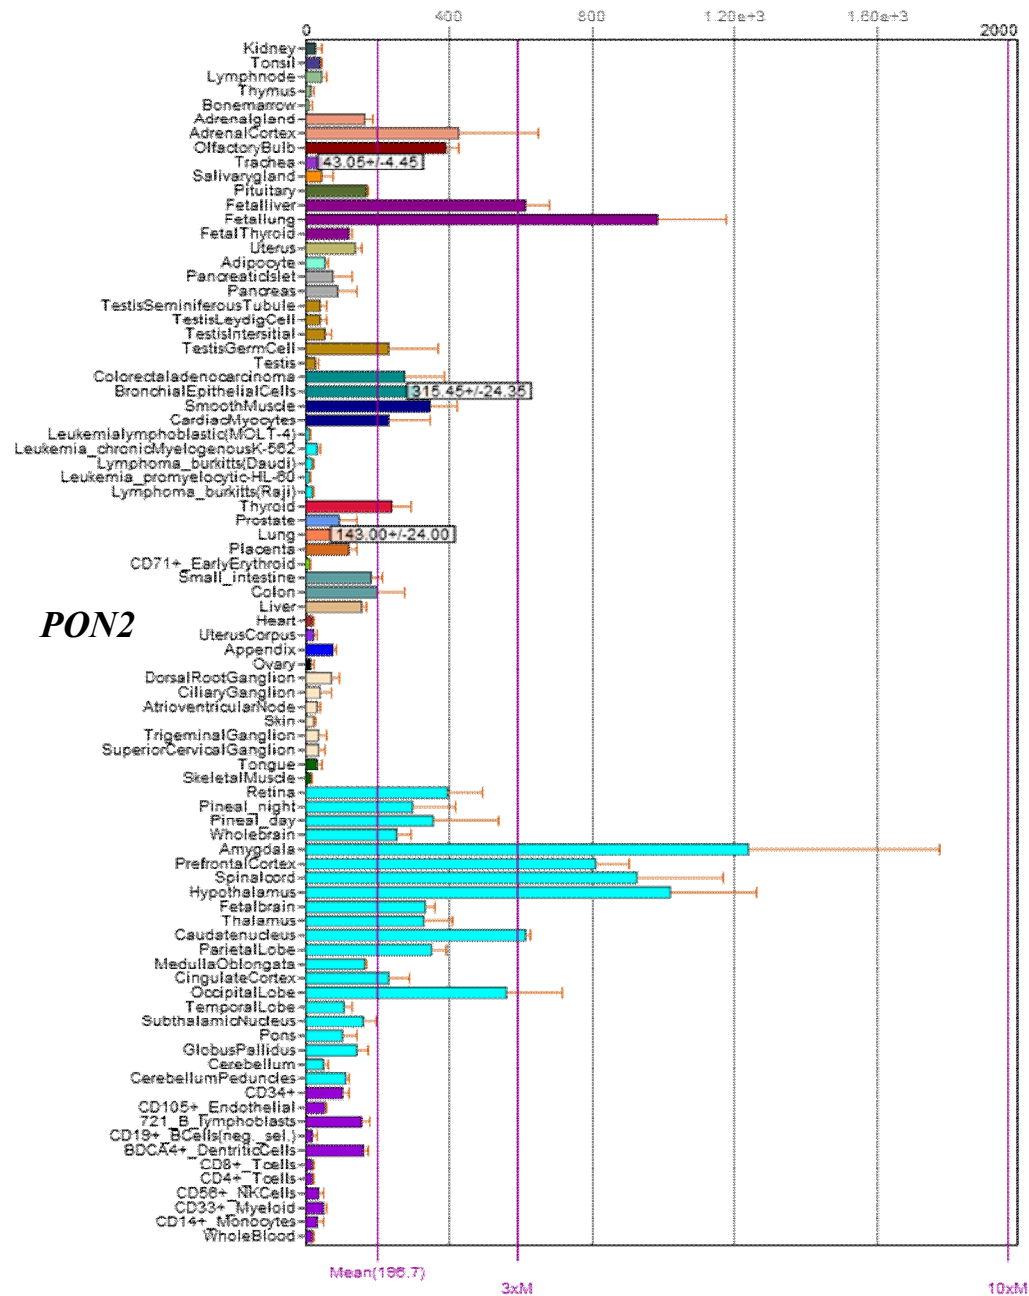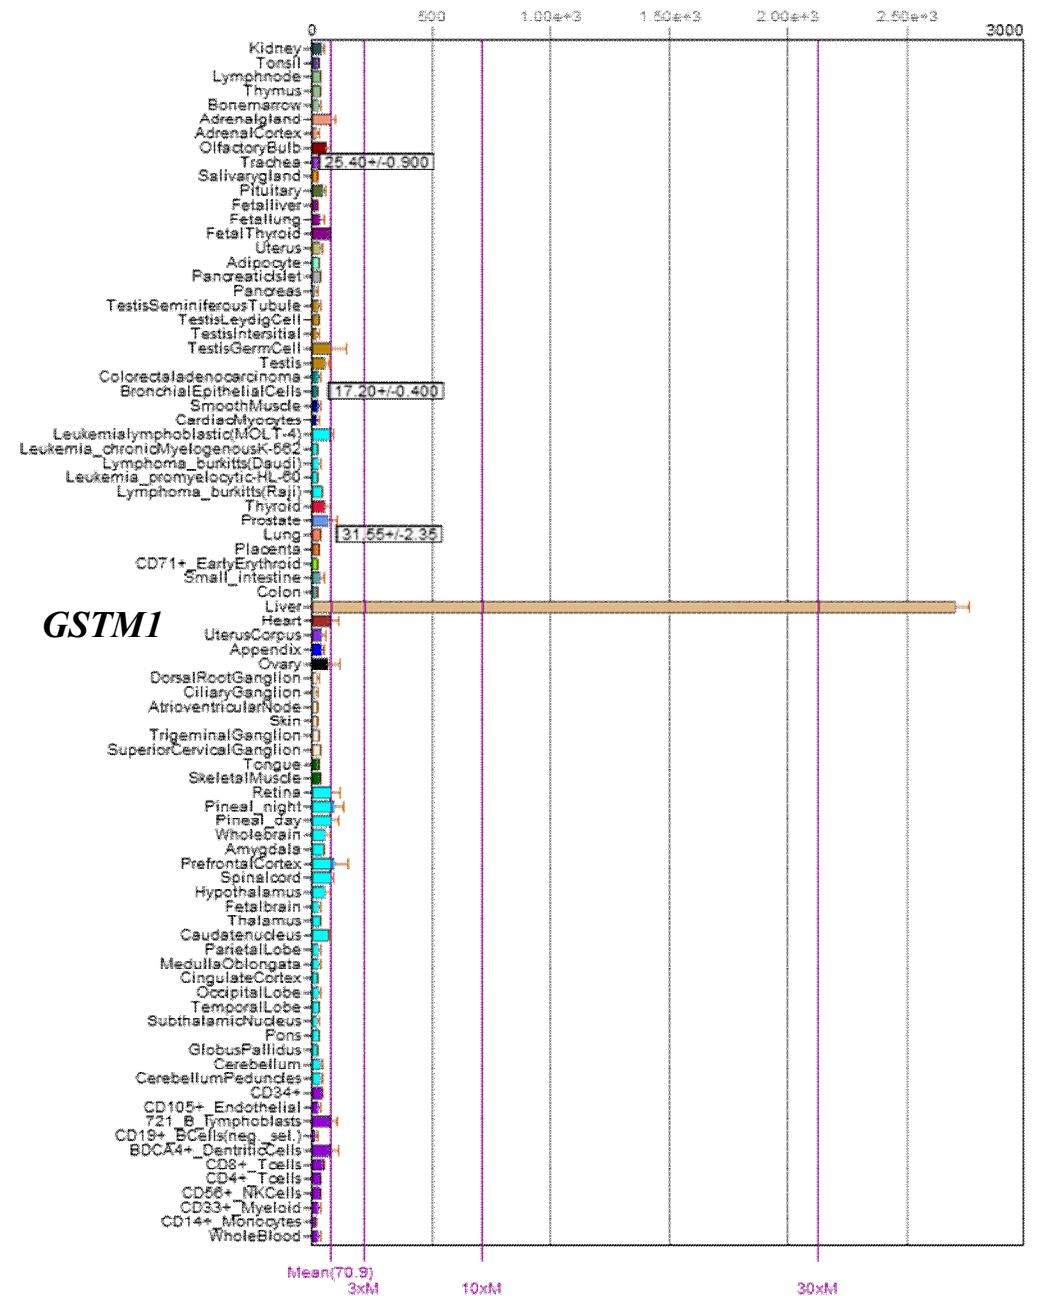

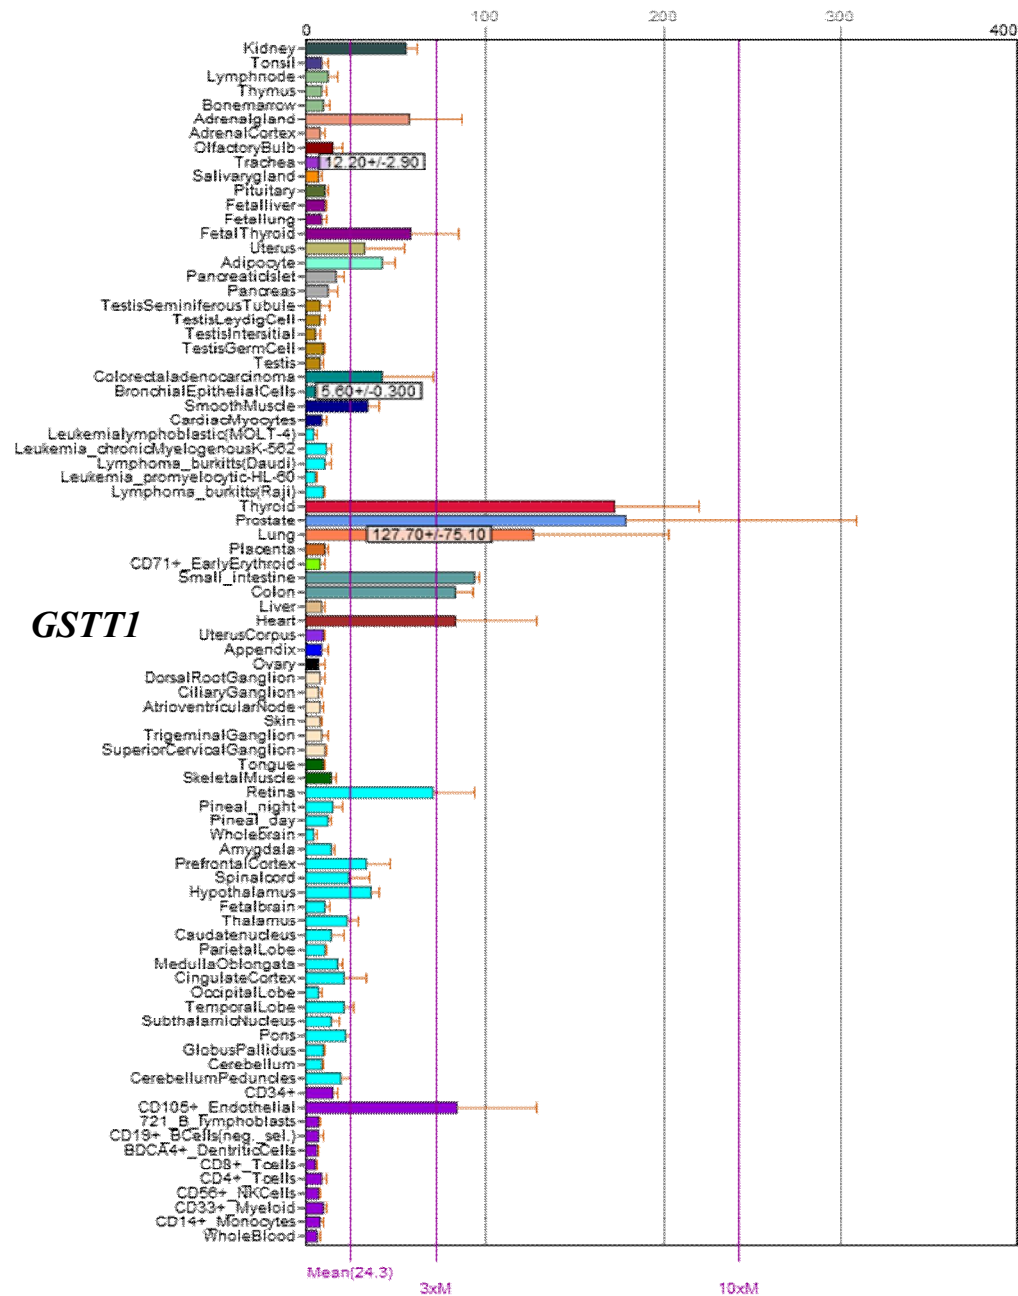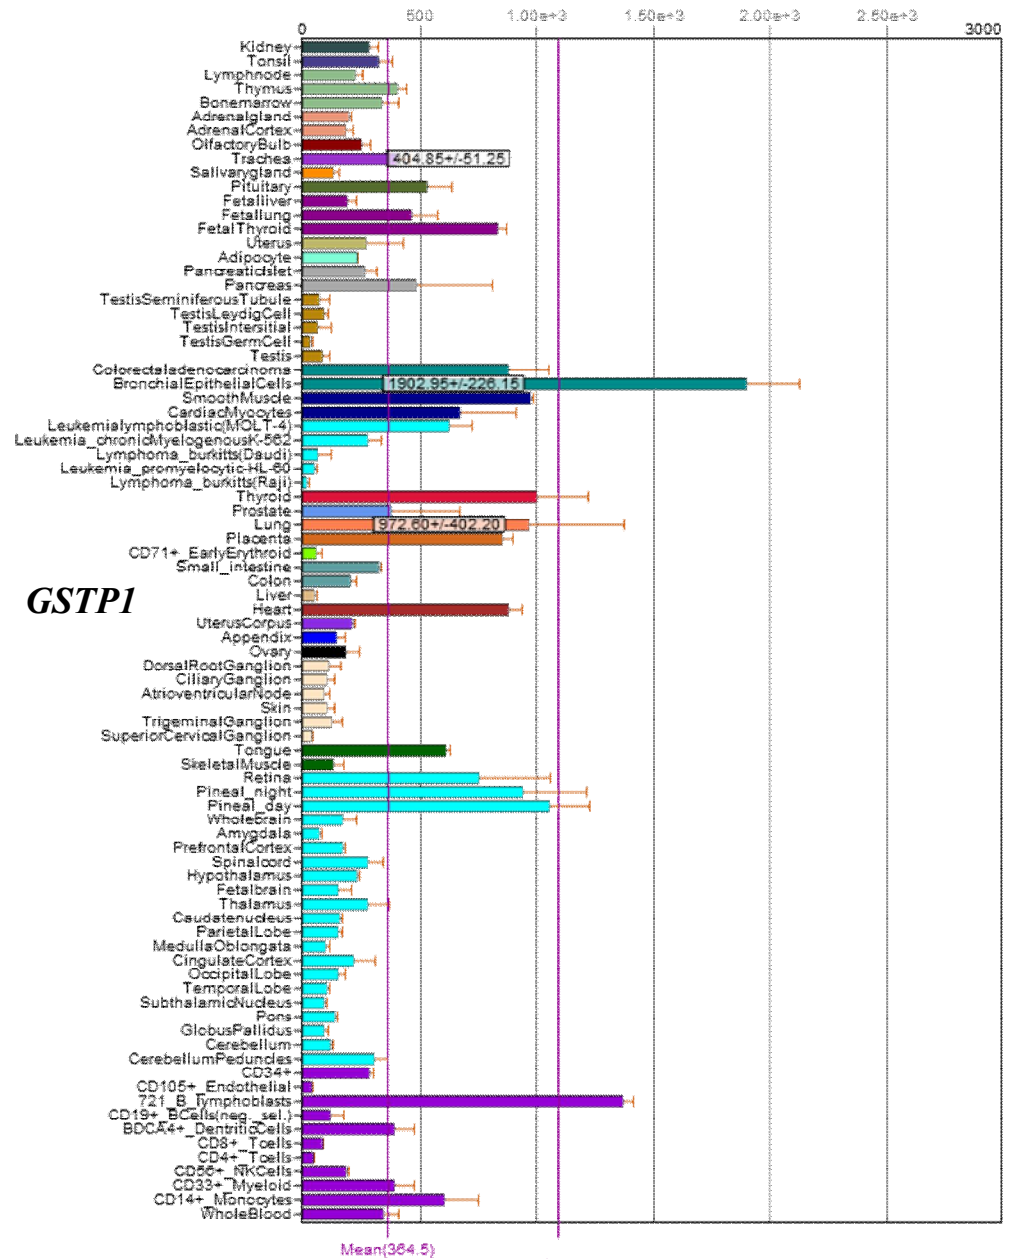

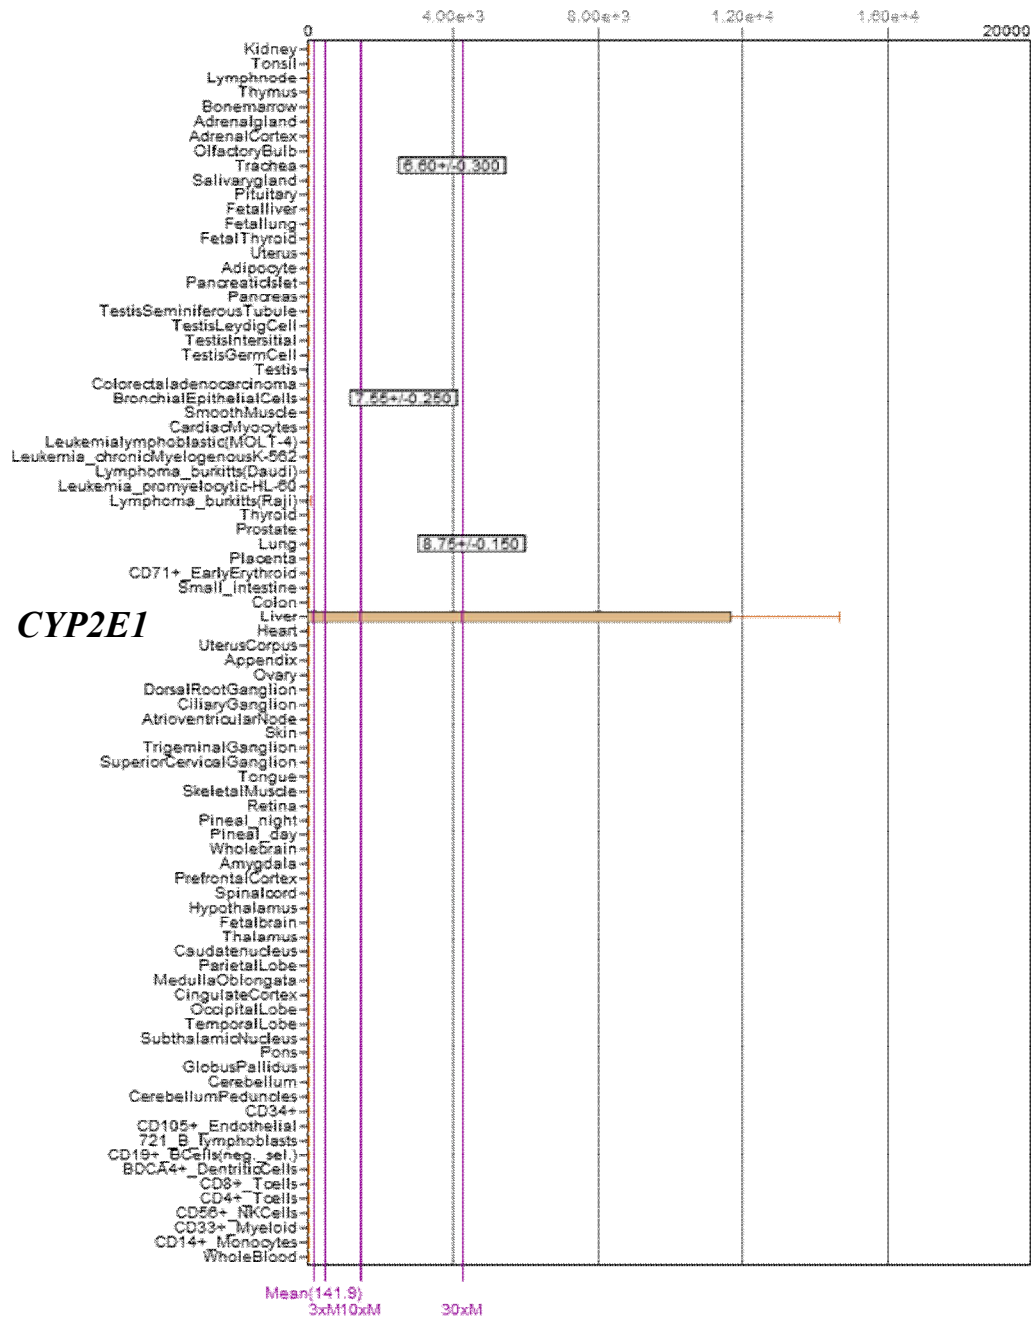

\* indicates expression levels in cell types/tissues/organs of the respiratory system
